# Supplementary material
Source: MDPI journal article supplement (https://www.mdpi.com/2379-139X/10/3/33)
Supplement: s1 [file s1]

| Subject | Group      | Mismatch | OS*  | Cho/NAA $\geq$ 2x (cc) | T1CE (cc) | Difference (cc) | GTV2 (cc) | CTV2 (cc) |
|---------|------------|----------|------|------------------------|-----------|-----------------|-----------|-----------|
| EM004   | Control    | Low      | 63.0 | 9.1                    | 2.7       | 6.4             | 16.8      | 48.0      |
| EM005   | Control    | Low      | 14.9 | 17.1                   | 0.8       | 16.3            | 40.8      | 79.3      |
| EM006   | Control    | Low      | 35.0 | 24.8                   | 0.0       | 24.8            | 55.1      | 105.2     |
| EM008   | Control    | Low      | 13.5 | 11.9                   | 1.0       | 10.9            | 19.3      | 48.7      |
| EM010   | Control    | Low      | 16.0 | 35.9                   | 4.9       | 31.0            | 50.8      | 97.7      |
| EM013   | Control    | Low      | 6.0  | 29.5                   | 5.4       | 24.1            | 49.2      | 110.7     |
| EM001   | Control    | High     | 16.8 | 42.8                   | 6.6       | 36.3            | 91.6      | 158.1     |
| EM002   | Control    | High     | 34.6 | 32.7                   | 1.5       | 31.2            | 57.1      | 117.5     |
| EM003   | Control    | High     | 29.1 | 73.4                   | 36.7      | 36.7            | 46.3      | 95.0      |
| EM007   | Control    | High     | 22.4 | 54.8                   | 20.6      | 34.2            | 75.1      | 154.9     |
| EM011   | Control    | High     | 6.2  | 65.0                   | 30.3      | 34.8            | 37.7      | 95.4      |
| EM012   | Control    | High     | 9.3  | 51.3                   | 1.1       | 50.2            | 48.0      | 97.8      |
| EM015   | Belinostat | Low      | 18.7 | 30.1                   | 29.7      | 0.4             | 59.8      | 121.8     |
| EM024   | Belinostat | Low      | 53.6 | 9.2                    | 2.5       | 6.7             | 39.2      | 86.5      |
| EM021   | Belinostat | Low      | 13.6 | 18.7                   | 10.7      | 8.0             | 43.9      | 87.6      |
| EM014   | Belinostat | Low      | 50.0 | 14.6                   | 5.5       | 9.1             | 37.9      | 71.8      |
| EM022   | Belinostat | Low      | 23.4 | 12.2                   | 2.4       | 9.8             | 54.1      | 98.0      |
| EM017   | Belinostat | High     | 7.5  | 39.0                   | 18.9      | 20.1            | 22.0      | 50.4      |
| EM023   | Belinostat | High     | 20.7 | 29.9                   | 7.0       | 22.9            | 39.2      | 79.2      |
| JH002   | Belinostat | High     | 13.3 | 52.0                   | 27.6      | 24.4            | 28.8      | 130.9     |
| JH003   | Belinostat | High     | 14.4 | 61.9                   | 13.8      | 48.1            | 58.9      | 94.4      |
| EM016   | Belinostat | High     | 18.8 | 53.7                   | 5.3       | 48.4            | 80.7      | 142.6     |
| EM025   | Belinostat | High     | 9.6  | 62.8                   | 0.0       | 62.8            | 65.7      | 144.2     |

**Supplementary Table S1:** Pre-Treatment Volumes and Overall Survival for all patients
