# Supplementary material
Source: MDPI journal article supplement (https://www.mdpi.com/2379-139X/10/3/33)
Supplement: s1 [file s1]

| Subjects | Group      | Mismatch | rCE (cc) | Cho/NAA $\geq 2X$<br>& rCE <sub>Ex-GTV2</sub> (%) | GTV2 &<br>rCE <sub>Ex-Cho/NAA</sub> (%) | Cho/NAA $\geq 2X$<br>& rCE <sub>Ex-CTV2</sub> (%) | CTV2 &<br>rCE <sub>Ex-Cho/NAA</sub> (%) |
|----------|------------|----------|----------|---------------------------------------------------|-----------------------------------------|---------------------------------------------------|-----------------------------------------|
| EM004    | Control    | Low      | 1.07     | 0.00                                              | 72.53                                   | 0.00                                              | <b>100.00</b>                           |
| EM005    | Control    | Low      | 4.52     | 0.00                                              | 91.16                                   | 0.00                                              | <b>98.61</b>                            |
| EM006    | Control    | Low      | 1.44     | <b>93.75</b>                                      | 39.62                                   | 0.09                                              | 39.84                                   |
| EM008    | Control    | Low      | 37.33    | 19.92                                             | 35.58                                   | 9.67                                              | <b>59.58</b>                            |
| EM010    | Control    | Low      | 22.48    | <b>39.53</b>                                      | 48.57                                   | 0.00                                              | 54.06                                   |
| EM013    | Control    | Low      | 21.55    | 3.95                                              | 64.34                                   | 0.00                                              | <b>78.40</b>                            |
| EM001    | Control    | High     | 34.99    | 16.22                                             | 50.99                                   | 0.02                                              | <b>63.79</b>                            |
| EM002    | Control    | High     | 0.21     | <b>27.91</b>                                      | 20.89                                   | 0.00                                              | <b>60.89</b>                            |
| EM003    | Control    | High     | 5.39     | 57.89                                             | 28.20                                   | 0.00                                              | 29.90                                   |
| EM007    | Control    | High     | 1.02     | 0.00                                              | 65.58                                   | 0.00                                              | <b>100.00</b>                           |
| EM011    | Control    | High     | 41.69    | <b>27.36</b>                                      | 51.56                                   | 13.60                                             | <b>67.41</b>                            |
| EM012    | Control    | High     | 0.98     | <b>22.86</b>                                      | 60.99                                   | 16.03                                             | <b>69.50</b>                            |
| EM014    | Belinostat | Low      | 0.82     | <b>21.53</b>                                      | 49.10                                   | 6.06                                              | 54.40                                   |
| EM015    | Belinostat | Low      | 4.09     | <b>26.77</b>                                      | 0.00                                    | 12.37                                             | 0.00                                    |
| EM021    | Belinostat | Low      | 28.61    | <b>26.71</b>                                      | 32.40                                   | 14.50                                             | <b>96.10</b>                            |
| EM022    | Belinostat | Low      | 1.65     | 0.00                                              | 1.40                                    | 0.00                                              | 6.70                                    |
| EM024    | Belinostat | Low      | 13.79    | 3.61                                              | 29.70                                   | 0.00                                              | 46.00                                   |
| EM016    | Belinostat | High     | 23.66    | <b>32.74</b>                                      | 0.00                                    | 5.19                                              | 0.00                                    |
| EM017    | Belinostat | High     | 0.35     | 0.00                                              | 55.20                                   | 0.00                                              | <b>61.20</b>                            |
| EM023    | Belinostat | High     | 0.13     | 0.00                                              | 0.80                                    | 0.00                                              | 13.80                                   |
| EM025    | Belinostat | High     | 19.03    | <b>53.73</b>                                      | 24.40                                   | 13.83                                             | 49.10                                   |
| JH002    | Belinostat | High     | 69.19    | 0.03                                              | 97.20                                   | 0.00                                              | <b>100.00</b>                           |
| JH003    | Belinostat | High     | 14.16    | <b>26.02</b>                                      | 78.00                                   | 26.99                                             | <b>86.90</b>                            |

**Supplementary Table S2:** Recurrence analysis calculations for each patient on the date of recurrence.
